# Supplementary material
Source: publisher figshare collection journal article supplement (https://tandf.figshare.com/ndownloader/files/36011599)
Supplement: Supplementary file 1 [file 36011599]

## Sheet: table 4
Table S5：The mRNAs differentially expressed during muscle development
Transcript_id	Gene_id	Feature_id	NoADBJ_FPKM	ADBJ_FPKM	Log2(foldchange)	Pvalue	Qvalue
XM_014826562.1	106848689	transcript	3.38898	0.27684	3.61373	0.00625766	0.0906286
XM_014826568.1	106821737	transcript	11.5645	2.74865	2.07291	4.00465e-05	0.0331326
XM_014826571.1	106821738	transcript	773.84	139.765	2.46903	0.00290752	0.074761
XM_014826590.1	106821748	transcript	33.4143	62.4854	-0.903053	0.019197	0.130602
XM_014826593.1	106821749	transcript	4.73486	2.21494	1.09605	0.0144515	0.118846
XM_014826598.1	106821753	transcript	2.90927	8.17941	-1.49134	0.0127422	0.11348
XM_014826610.1	106821757	transcript	442.503	347.664	0.347992	0.0399425	0.173713
XM_014826615.1	106821762	transcript	5.69811	13.2243	-1.21464	0.00531478	0.087935
XM_014826623.1	106821769	transcript	6.16111	2.74496	1.16641	0.0487353	0.189117
XM_014826648.1	106821781	transcript	2.40097	0.0247843	6.59805	0.000462125	0.0571701
XM_014826769.1	106821898	transcript	12.664	8.07118	0.649887	0.0222331	0.136514
XM_014826789.1	106821911	transcript	16.2075	30.5009	-0.91219	0.00784773	0.0973353
XM_014826800.1	106821912	transcript	6.36815	21.2542	-1.73881	0.0284099	0.152871
XM_014826808.1	106821916	transcript	5.61049	1.35908	2.0455	0.0438766	0.181015
XM_014826812.1	106821921	transcript	7.00077	4.29541	0.704717	0.00656772	0.0918389
XM_014826815.1	106821922	transcript	9.55476	6.23019	0.616942	0.00423479	0.0838745
XM_014826817.1	106821923	transcript	22.9875	4.49302	2.35509	0.0237558	0.140327
XM_014826819.1	106821923	transcript	17.3181	3.92448	2.14171	0.0312111	0.156947
XM_014826820.1	106821923	transcript	15.8365	1.43656	3.46256	0.0272552	0.150095
XM_014826821.1	106821923	transcript	19.1004	1.82577	3.38703	0.00315051	0.0761476
XM_014826822.1	106821923	transcript	87.6273	3.41633	4.68086	0.0458783	0.184893
XM_014826824.1	106821906	transcript	2.71649	5.53536	-1.02693	0.0306803	0.156362
XM_014826832.1	106821928	transcript	27.4575	16.0378	0.775722	0.00327282	0.0769517
XM_014826833.1	106821930	transcript	15.748	32.676	-1.05306	0.00266055	0.0739539
XM_014826853.1	106821952	transcript	9.9885	39.8572	-1.9965	0.00214748	0.0690661
XM_014826857.1	106821955	transcript	7.00207	11.0557	-0.658943	0.0194904	0.130742
XM_014826867.1	106821964	transcript	3.17246	6.62167	-1.06159	0.0361108	0.16598
XM_014826868.1	106821965	transcript	10.3214	3.5859	1.52523	0.0154709	0.122292
